# Elephants have an adaptable prehensile grip

Andrew K. Schulz<sup>1,2</sup>, Joy S. Reidenberg<sup>3</sup>, Jia Ning Wu<sup>1</sup>, Cheuk Ying Tang<sup>4</sup>,  
Benjamin Seleb<sup>5</sup>, Josh Mancebo<sup>6</sup>, Nathan Elgart<sup>6</sup>, and David L. Hu<sup>1,5\*</sup>

Schools of Mechanical Engineering<sup>1</sup> and Biological Sciences<sup>5</sup>

Georgia Institute of Technology, Atlanta, GA 30332, USA

Max Planck Institute for Intelligent Systems<sup>2</sup>, Stuttgart, Germany

Center for Anatomy and Functional Morphology<sup>3</sup>

Radiology, Neuroscience, & Psychiatry Translation and Molecular Imaging Institute<sup>4</sup>

Icahn School of Medicine at Mount Sinai, New York, NY

Zoo Atlanta<sup>6</sup>, Atlanta, GA 30315, USA

October 6, 2022

## Corresponding author:

David L. Hu

801 Ferst Drive, MRDC 1308, Atlanta, GA 30332-0405

(404)894-0573

hu@me.gatech.edu

## Keywords:

weight lifting, power, capstan

## Abstract

Although it is well-known that elephants use their trunk in a prehensile fashion, little is known about the mechanics of their grip. In this study, we show that an African elephant recruits greater length of its trunk with increasing weight lifted. We measure the wrinkle and trunk geometry from a frozen elephant trunk at the Smithsonian and challenge a female African elephant at Zoo Atlanta to lift various barbell weights using only its trunk. The elephant lifts a 60-kg weight at a speed of 1 m/s, employing 450 watts of power. Increasing weights cause the trunk's contact area with the weight to increase six-fold. Our findings may inspire the design of more adaptable soft robotic grippers.

## 1 Introduction

Prehension is the ability to grasp or seize by wrapping around (Jones-Engel & Bard, 1996). Many tree-foraging animals evolved prehensile appendages to grasp branches (Garber & Rehg, 1999; Hickman, 1979; Hoffmann, Montag, & Dominy, 2004; Negrea, Botnariuc, & Dumont, 1999). While this behavior has long been observed, there have been few systematic studies of the mechanics of prehensile gripping. In the following study, we train elephants to lift weights with their trunk.

Prehensile tails are thought to have evolved in the dense South American forests, where animals often traverse narrow supports and distribute their weight to the surrounding canopy (Emmons & Gentry, 1983; McGinn, 2015). The most well-known examples of prehensile animals are the Atelinae, a subfamily of monkeys that includes howler and spider monkeys (Laska, 1998). Both spider and howler monkeys can hang their entire body weight (up to 10 kg) from their tail, a behavior that frees their hands to manipulate fruit (Laska, 1996). Such strength requires substantial musculature, innervation to control the tail, and a particular region in their brain for tail control.

34 Another adaptation that makes these monkeys more prehensile than their relatives the capuchins,  
35 is their friction pad, a hairless and highly sensitive strip of skin on their tail (Organ, Muchlinski,  
36 & Deane, 2011). Capuchins in contrast have a tail that is covered in fur. Due the monkey’s quick  
37 movement through the dense canopy, there is little measurement of how they grip branches with  
38 their tail (Russo & Young, 2011). In this study, we hope to improve our understanding of prehensile  
39 appendage use in systematic experiments with highly trainable African elephants.

40 While Atelines can support their entire body using their tail, six lineages of mammals evolved  
41 prehensile but weaker tails. The tamandua, an arboreal anteater uses its tail for support while  
42 feeding (Cartmill, 1972). Giraffes have a prehensile tongue used to grasp leaves and clean their  
43 faces (Pretorius et al., 2016). Seahorses don’t swim with their tail; instead they use it anchor  
44 onto coral. A unique aspect of the seahorse tail is its square-shaped cross section, which increases  
45 contact area with the substrate (Lourie, Pollom, & Foster, 2016). Moreover, when compressed in  
46 the jaws of a predator, the square tail better survives compression than a circular tail (Porter,  
47 Adriaens, Hatton, Meyers, & McKittrick, 2015).

48 Many tools in the human-built world such as knobs, steering wheels, and door handles, were  
49 designed to be operated by the human hand. Thus, there has been much interest in robotics  
50 in building prehensile manipulators (Iberall, 1997). The human hand has five fingers, over 25  
51 degrees of freedom, and three grasping motor primitives (transverse, perpendicular, or parallel to  
52 the palm). Motor primitives are described as neural mechanisms that assists with coordinated  
53 motions. Different postures present varying degrees of force, motion, and sensory information  
54 (Iberall, 1997). Like the human hand, the elephant can move with both precision and and high  
55 force. While the 3D kinematics of the elephant trunk grasping different shaped objects has been  
56 recently recorded, the weight of these objects was not varied (Dagenais, Hensman, Haechler, &  
57 Milinkovitch, 2021; Schulz et al., 2021; Wu et al., 2018). In this study, we consider how object  
58 weight affects the elephant’s prehensile grip. Our observations of the degree of wrapping may  
59 inspire more quantitative studies of prehensile behavior and the design of prehensile robotics.

60 We begin in §2 with our experimental methods for working with elephants. In §3, we present  
61 our calculations of trunk tension, power, and surface area. We report the results of our experiments  
62 in §4. We then discuss the repercussions of our work in §5 and conclude in §6.

## 63 2 Materials and Methods

### 64 2.1 Elephant experiments

65 Experiments were performed with a 35-year-old female African Elephant (*Loxodonta africana*) of  
66 mass 3360 kg and height 2.6 m. We conducted experiments outdoors, at the edge of the elephant’s  
67 enclosure at Zoo Atlanta. The experiments occurred over two-hour periods in the mornings of spring  
68 and summer 2018 before Zoo Atlanta opened to the public. The staff at Zoo Atlanta supervised  
69 all experiments.

70 To train the elephant to lift, the zookeepers used a reward system beginning with gesturing the  
71 elephant towards the barbell (**Figure 1b**). If the elephant accomplished the correct task of grabbing  
72 and lifting the bar, food was rewarded (**Figure 1c-d**). If an incorrect outcome was observed, then  
73 the experimental procedure was repeated until the trial was successful. Once an 80% success rate  
74 was achieved, we commenced weightlifting experiments (**Figure 2a**). It took 15 attempts and 10  
75 minutes of training to accomplish an 80% success rate.

76 Experiments were conducted with a Smith Machine (Powerline PSM144X, 2.0 x 1.1 x 1.9 m),  
77 which uses twin friction-less carriages to constrain the barbell to move vertically. The barbell was  
78 placed at a set distance of  $w = 0.5 \pm 0.05$  m ( $n=22$ ) away from the enclosure bars. As a result of

79 this distance, the elephant had to rely on its trunk to lift. Without the restraint of the bars, the  
80 elephant would likely use a combination of its forehead, trunk, and tusks to lift heavy objects.

81 Iron weight plates were added to the 20-kg bar to provide the elephant a set of six weights  
82 comprising 20, 25, 30, 35, 43, and 60 kg. The elephant completed four trials of each weight with  
83 a food reward and one minute rest between each lift. When weights were changed, five minutes of  
84 rest was given to change the weights and re-secure the frame to the ground using 80 kg of barbell  
85 weights.

86 Twenty-two barbell lifts were filmed using a high-definition digital video camera (Sony HDRXR200)  
87 and iPhone 8. We tracked the position of the weight along the 2.0 m height of the Smith machine  
88 to accurately determine the barbell height. In two trials, the elephant barely lifted the bar above  
89 its original position; such experiments were considered incomplete, and the data was not analyzed.  
90 Analysis of the elephant lifting 50 kg was removed from the analysis because the elephant broke the  
91 Smith machine during the 50 kg test. During testing the elephant struggled to lift the 60 kg barbell  
92 and only proceeded to lift it twice. We tracked the trunk by first drawing along a line of chalk on  
93 the mid-line of the right lateral side of the elephant trunk. Using Tracker, an open-source video  
94 analysis tool (<https://physlets.org/tracker/>), we tracked 60 equally spaced points along this line.  
95 The speed and acceleration of the elephant lift were determined by tracking the barbell side-view  
96 position.

## 97 2.2 Dissection of an elephant trunk

98 Icahn School of Medicine at Mount Sinai, New York provided access to a frozen trunk from a 38-  
99 year old female African elephant, *Loxodonta africana*, that initially lived in a Virginia zoo. Detailed  
100 information about the elephant can be found in the pathology report (**Supplemental Figure 1**).  
101 The elephant's body weight before death was approximately 4000 kg, and the weight, age, and sex  
102 of this elephant are comparable to those of the elephant filmed in our study. The trunk was cut  
103 into several parts and stored in a freezer in 2015 at  $-15^{\circ}\text{C}$  until we dissected it in July of 2016. In  
104 January of 2018, the specimen's distal tip was fully thawed and scanned on a Siemens Dual Source  
105 Force CT to measure the trunk's nasal passageways and outer diameter at an acquisition speed of  
106 737 mm/sec and a temporal resolution of 66 msec (**Figure 3a-b, Supplemental Video 4**). A  
107 helical scan was performed with 80 kV, 183 mAs, and a slice thickness of 0.5mm. We scanned the  
108 distal portion of the trunk up to around 110 cm from the tip as more of the trunk would not fit in  
109 the CT scanner. We obtained 27 measurements of the trunk's diameter inner diameter as the scan  
110 progressed from proximal root to distal tip (**Figure 4c**). We also rendered the entire CT image of  
111 the trunk to see the three-dimensional structure (**Supplemental Video 5**).

## 112 3 Mathematical Modeling

### 113 3.1 Elephant trunk geometry

114 We modeled both the elephant trunk and its nasal cavities as conical frustums (Read, 1937).  
115 Assuming the mass density of the trunk is  $\rho = 1180 \text{ kg/m}^3$ , measured from a cross-section of an  
116 elephant carcass' trunk (Wilson, Mahajan, Wainwright, & Croner, 1991), the mass  $m_t$  of a trunk  
117 segment of length  $z$  may be modeled using a frustum exterior with two frustums as nasal cavities.  
118 With these assumptions, the mass may be written (Bland, 1954):

$$m_t(z) = \frac{\pi\rho z}{3} [R^2(z) + R(z)R(0) + R^2(0) - 2(r^2(z) + r(z)r(0) + r^2(0))]. \quad (1)$$

119 The length  $z$  is measured from the trunk tip, and  $R(z)$  and  $r(z)$  are, respectively, the outer and  
120 inner radii of the trunk at a position  $z$ . Based on the frozen trunk measurements, the radii for  
121 the trunk tip are  $r(0) = 1.1$  cm and  $R(0) = 2.2$  cm. The nasal passages of the frozen trunk were  
122 squashed by self-weight; thus, we used the nasal circumference to extrapolate the inner radius  
123 (**Figure 4d**).

### 124 **3.2 Tension and power applied**

125 To determine the force required to lift the barbell, we considered a vertical force balance on the  
126 trunk tip. A control volume is shown schematically in **Figure 5a**. When the barbell is lifted, the  
127 elephant lifts both the barbell and the trunk itself. The total mass to be lifted is  $m = m_t + m_b$   
128 where  $m_b$  is the barbell mass and  $m_t$  is the mass of the trunk segment in contact with the barbell.  
129 The height of the trunk segments not in contact cannot be calculated without image analysis. Thus,  
130 a weakness of our method is that force and power will be under-estimated.

131 The angle  $\phi$  to the horizontal is measured when the trunk first begins lifting the barbell (**Figure**  
132 **5a**). The trunk exerts a tension  $T$  to lift. We neglect the displacement in the horizontal direction  
133 because the Smith Machine constrains the lift to the vertical direction. Since the trunk segment  
134 is wrapped around the barbell, both move with the same vertical speed  $\dot{y}$  and acceleration  $\ddot{y}$ . By  
135 Newton's law, the vertical force balance may be written

$$m\ddot{y} = -mg + T \sin \phi, \quad (2)$$

136 where  $g$  is the acceleration of gravity and  $T$  is the tension applied. Solving Equation (2) with  
137 respect to the tension force  $T$  yields

$$T = \frac{m(\ddot{y} + g)}{\sin \phi}. \quad (3)$$

138 Thus, by measuring the angle  $\phi$  and the acceleration  $\ddot{y}$ , we can estimate the force exerted to lift  
139 the barbell.

140 We calculate the power to lift two parts of the trunk, the tip and the base, which is located 160  
141 cm from the tip. Each of these parts has its own mass that is estimated from Equation (1). The  
142 average power exerted to lift part  $i$  of the trunk may be written as the ratio of the gravitational  
143 potential energy and duration  $t$  of lift. The gravitational potential energy of a trunk segment of  
144 mass  $m_i$  is written as  $U = m_i g y_i$ , where  $y_i$  is the change in the height of the center of mass of that  
145 portion of the trunk. The power is thus

$$P_i = \frac{m_i g y_i}{t}, \quad (4)$$

146 which is consistent with the definition of power for human weight lifters (Jones, Fry, Weiss, Kinzey,  
147 & Moore, 2008).

### 148 **3.3 Contact area**

149 The ventral part of the trunk is flat but covered with wrinkles. To estimate the contact area of  
150 the trunk and the barbell, we measure the frequency  $\omega$  and amplitude  $A$  of the trunk wrinkles at  
151 eight positions along the frozen elephant trunk with 10 different azimuthal positional measurement  
152 around the ventral section taken at each position. Previous measurements of strain during extension  
153 shows that the tip of the trunk, defined as the last 30 cm, stretches less than 10% strain, which is  
154 small compared to stretch mid-distally, which is 25 percent (Schulz et al., 2022). We thus assume

155 that the wrinkle geometry of the un-extended frozen trunk matches the live elephant. Assuming a  
156 sinusoidal wrinkle profile, the radius  $R$  of the ventral trunk skin as a function of distance  $z$  from  
157 the tip is written in the results section in Equation (4.3).

158 We report the amplitude  $A(z)$  and frequency  $\omega(z)$  in the results section and in **Figure 7E-F**.  
159 To calculate the surface area of contact of a trunk segment, we utilize the arclength formula which  
160 states the arclength  $s$  of the trunk segment is

$$s = \int_{z=z_0}^{z=z_f} \sqrt{1 + \left(\frac{dR}{dz}\right)^2}. \quad (5)$$

161 This integral is calculated numerically using MATLAB ode45, between the two points  $z_0$  and  $z_f$ ,  
162 which defines the trunk segment in contact with the bar. We assume the contact region is a wrinkled  
163 planar trapezoid of height  $s$ , and lengths  $D(z_f)$  and  $D(z_0)$ , which are the diameters of the trunk  
164 at the points  $z_f$  and  $z_0$ . The area of this trapezoid is :

$$SA = s \cdot \frac{D(z_f) + D(z_0)}{2}, \quad (6)$$

165 where we have assumed that the peaks and troughs and all the surface area of the wrinkles contact  
166 the bar.

## 167 4 Results

### 168 4.1 Trunk geometry

169 To calculate the force applied by the trunk, we first measure its shape. We characterize frozen  
170 trunk from the Smithsonian using CT-scanning and dissection (**Figure 3, Supplemental Video**  
171 **4**). At the proximal base, the cross-section is dominated by radial muscle shown by the light-colored  
172 muscle close to the nasal cavities. The large amount of radial muscle is presumably to help with  
173 lifting as the base does not stretch much longitudinally (**Figure 4e**) (Schulz et al., 2022). The  
174 longitudinal muscle is darker red and lies between the radial muscle and the skin of the trunk.  
175 The proportion of radial muscle shrinks progressively towards the distal tip, while the proportion  
176 occupied by the nostrils increases. The distal tip of the trunk lacks radial muscle and is instead  
177 dominated by two oblique muscle groups (**Figure 4b**), which assist with wrapping around objects,  
178 such as the barbell, as they come into contact.

179 The trunk is a hollow conical frustum permeated by a pair of nostrils. From the CT scans, we  
180 obtain a relationship for both the inner and outer radius of the trunk at a distance from the tip,  $z$   
181 (**Figure 4a**). The inner radius  $r$  is given by the open triangles and outer radius  $R$  by the closed  
182 points. The solid lines are linear least squares best fits given by

$$r(z) = 0.011 + 0.0002z, (R^2 = 0.95), \quad (7)$$

$$R(z) = 0.022 + 0.0006z, (R^2 = 0.99), \quad (8)$$

183 with all units in meters. At the tip, the inner and outer radii are 1.1 cm and 2.2 cm. At a point  
184 100 cm from the tip, the trunk has an inner and outer radii of 3 cm and 8 cm. By integrating  
185 the volume of the trunk, Equation (1), we find that the trunk mass is 97 kg, which is close to  
186 the experimental measurement of 110 kg. The mass  $m_t$  of the trunk segment in contact with the  
187 barbell was calculated for each experiment based on the length in contact. The weight of the trunk  
188 in contact ranged from 5.4 kg for the lightest barbell up to 9.0 kg for the heaviest.

## 189 4.2 Lifting force

190 The elephant lifts the barbell by first wrapping its trunk tightly around it (**Figure 1**). Although  
191 the trunk is initially straight when it reaches for the barbell, the trunk arches as it lifts (**Figure**  
192 **2a** and **Supplemental Video 1-3**), acting like a bending beam supporting a load at its tip. The  
193 total energy expended for each barbell weight is related to the maximum height of the lift  $y_{max}$ ,  
194 shown in **Figure 2c**. The linear best fit, shown by the dashed line, is

$$y_{max} = 1.64 - 0.026m_b, (R^2 = 0.95) \quad (9)$$

195 where  $y_{max}$  is the height lifted in meters. For this and future equations,  $m_b$  is the weight of the  
196 barbell in kg. The elephant lifted the lightest weight to a height of  $1.19 \pm 0.1$  m (n=4), nearly  
197 touching the top of the weight rack, and the heaviest weight to less than one-tenth the height  
198  $0.1 \pm 0.05$  m (n=2). Clearly, the elephant lifted heavier weights to lower heights. The x-intercept  
199 of Equation (9) shows that the maximum weight that elephants can lift in this setup is 63  
200 kg, which is just 2% of its body weight and 65% of its trunk weight. We surmise that the barbell  
201 apparatus constrains the elephant's trunk motion to the vertical direction, which prevents the  
202 elephant from using body weight to push or lift the object.

203 The time course of the barbell height  $y_b$  is shown in **Figure 2b**, where we spaced out the  
204 trajectories for clarity. After the trunk wrapped around the barbell, the lifts were fast, taking  
205 approximately 0.5 – 0.8 s across the weight classes. Each function was fit with two quadratic  
206 best fits separated by an inflection point between the acceleration and deceleration phases. The  
207 inflection point usually occurs midway of the lift duration. In the acceleration phase, the position  
208 may be written as  $y_b = at^2$  where  $t$  is time and  $a$  is the acceleration. This equation describes lifting  
209 from a rest position with a constant acceleration  $a$ . Such a relationship fits the acceleration phase  
210 well, with an  $R^2$  greater than 0.95. The deceleration phase was fit with the position and velocity  
211 at the inflection point, as well as a constant deceleration:  $y_b = y_0 + vt - bt^2$ . We found no clear  
212 trend between deceleration and barbell mass, so the deceleration was not reported. The fits for  
213 the entire lift are shown in **Figure 2b**. The acceleration  $\ddot{y}_b = a$  for each barbell mass is shown in  
214 **Figure 2d**, with the linear best fit given by

$$\ddot{y}_b = 4.49 - 0.043m_b, (R^2 = 0.63), \quad (10)$$

215 where  $\ddot{y}_b$  is in  $m/s^2$  and  $m_b$  is in kg. Equation (10) indicates that an elephant has a lower acceleration  
216 for heavier weights: acceleration ranges from  $3.9 m/s^2$  for the lowest weight to less than half that  
217 value for a weight three times heavier.

218 Upstream of the trunk, lifting the barbell is accomplished by some combination of rotation and  
219 lifting of the head. We measured the position of the trunk base, defined as the trunk region 160  
220 cm from the tip. We located this point in the video by the apex of the tusk. The blue points in  
221 **Figure 2d** shows the vertical acceleration of the trunk base: the acceleration of  $1 m/s^2$  is small  
222 compared to most of the trunk tip accelerations. We conclude that the neck is not lifting. Instead,  
223 it acts like a fulcrum to provide rotational motion to assist lifting by the trunk tip.

224 To calculate the tension applied by the trunk, we measured the angle that the trunk intersects  
225 the barbell. **Figure 5b** gives the angle  $\phi$  of the trunk with respect to the horizontal, where the  
226 dashed line is the least square linear best fit. The relationship between angle of trunk and barbell  
227 mass is

$$\phi = -6.4 + 1.6m_b, (R^2 = 0.94), \quad (11)$$

228 with  $\phi$  in degrees. An angle of 90 degrees indicates that the elephant orients its trunk vertically.



229 The elephant increases the angle of contact  $\phi$  from  $23 \pm 3^\circ$  (n=4) for the lightest weight to nearly  
230 four times that amount, or  $89 \pm 2^\circ$  (n=2), for the heaviest.

231 Given the angle of contact,  $\phi$ , and the length of the trunk  $z$  wrapped around the bar, we  
232 calculate the trunk tension  $T$  using Equation (3) in the Math Methods. The relationship between  
233 tension and the mass lifted is shown in **Figure 5c**. Although the barbell weights increase by a  
234 factor of three, the tension increases by only 20%, maintaining an average value across all trials of  
235  $620 \pm 64$  N (n=22). We thus see that elephants have dual “strategies” to reduce tension when lifting  
236 heavy weights: they decrease acceleration and orient their trunk more vertically. These strategies  
237 may not be volitional: they may simply arise from trying to lift a heavier weight with a finite  
238 muscle of limited force and power. Nevertheless, we see the trunk adapts to different postures and  
239 kinematics for different weights.

240 **Figure 6b** shows the relationship between power exerted and the mass lifted, with red points  
241 referring to the trunk base and black points to the trunk tip. These powers are over-estimates  
242 because they only consider the maximum deflection of the highest point rather than the center of  
243 mass of each section. The power-expenditure of the tip is U-shaped, with a peak power of  $357 \pm 79$   
244 W (n=4) for intermediate masses. No matter what weight lifted, the power expended at the trunk  
245 base remains higher than the trunk tip.

### 246 4.3 Prehension

247 Although the elephant was a constant distance to the bar, it wrapped a greater length of its trunk  
248 to lift heavier weights. **Figure 6a** shows the progression of trunk wrapping, from  $\theta = 87 \pm 6^\circ$  (n=4)  
249 to  $400 \pm 12^\circ$  (n=2), an increase of 400% in wrapping angle. In order to lift the lightest weights ( $m_b$   
250 = 20 and 25 kg), the trunk’s distal tip extended past the barbell and wrapped around the bottom  
251 half, creating a lip that kept the barbell in place. When lifting medium weights ( $m_b = 30 - 43$   
252 kg), the trunk extended further, using a thicker section of its trunk to wrap. And finally when the  
253 elephant lifted the heaviest weight ( $m_b = 60$  kg), the trunk wrapped 413 degrees, or more than a  
254 full cycle.

255 Wrapping a greater angle increases the area of contact between the barbell and elephant trunk.  
256 We note that the largest angle that supports the weight of the barbell is 180 degrees, corresponding  
257 to the bottom half of the barbell. Any additional wrapping helps with stability rather than weight  
258 support.

259 For us to rationalize the increased wrapping angle with heavier weights, we consider the capstan,  
260 a rotating device that amplifies a sailor’s ability to pull a rope (Gao, Wang, & Hao, 2015). The  
261 classical capstan model shows that  $T_b/T_a = e^{-\mu\theta}$  where  $\theta$  is the angle subtended by the capstan,  
262  $\mu$  is the coefficient of friction, and  $T_b/T_a$  is the ratio of the sailor’s force to the force on the other  
263 end of the rope. Assisted by the friction on the rope wrapped around the capstan, the sailor can  
264 amplify its force  $T_b$  to support a load  $T_a$ .

265 Applying the capstan problem to the barbell wrapping, we may consider the “sailor” to be  
266 the gravitational force  $T_b = m_t g$  imposed by the pendent mass  $m_t$  that is wrapped around the  
267 barbell. The weight of the pendent as well as the friction at the contact area opposes the barbell  
268 weight  $T_a = m_b g$ . By wrapping greater angles, the elephant can use the weight of the pendant  
269 to avoid losing grip on the barbell as it is lifted. Based on the arclength of trunk wrapped, the  
270 calculate the weight of the pendent mass varies from 5.4 to 9 kg, and increases with barbell mass.  
271 Simplifying the capstan model, we find

$$\theta = a \ln (b m_b) \quad (12)$$

272 where  $a = \frac{1}{\mu}$  and  $b = \frac{1}{m_t}$ . A least-square best fit is given in red which fits the data quite well, show-  
273 ing that 100–300 degrees of wrap is sufficient to hold the barbell (**Figure 6a**). The free parameter  
274 for the best fit is a high but physically reasonable friction coefficient of  $\mu = 1.5$ , comparable to the  
275 friction coefficient of 1.6 for bio-mimetic snake robots scales on styrofoam (Marvi, Meyers, Russell,  
276 & Hu, 2011). Snakes can change the angle of their ventral scales to increase frictional forces as  
277 they climb tree trunks and other vertical surfaces. Such actively deformable surfaces are analogous  
278 to the friction-enhancing wrinkles and coarse hair on the trunk. For comparison, we show in blue  
279 the another wrapping angle using the friction coefficient of human skin on metal ( $\mu = 0.8$ ). In-  
280 deed, such a low friction coefficient requires wrapping angles of 200-500 degrees, which are higher  
281 than the observed angles. Both results bound the data and give rationale that the combination of  
282 self-weight of the pendant mass and friction of the skin prevent the barbell from slipping as it is  
283 lifted.

284 Our capstan model assumed a constant friction coefficient, but the trunk may be able to modify  
285 its friction coefficient using its wrinkled grip, as shown in **Figure 7A**. Assuming that the trunk  
286 surface has a sinusoidal wrinkle pattern, the wrinkle height may be written

$$y_{wrinkle} = A(z) \sin \frac{2\pi}{\lambda(z)} z \quad (13)$$

287 which is shown in **Figure 7B**. We measured by hand the amplitude  $A$  and wavelength  $\lambda$  as a  
288 function of the distance  $z$  from the tip. A linear least squares best fit shows that wrinkles increase  
289 both their amplitude and wavelength with distance from the tip:

$$A(z) = 0.0174z + 0.4461 (R^2 = 0.95) \quad (14)$$

290

$$\lambda(z) = 0.036z + 0.051 (R^2 = 0.97) \quad (15)$$

291 (**Figure 7E-F**) where  $A, \lambda, z$  are in cm. Using these relationships, we use equation Equation (6) to  
292 estimate the surface area of the wrinkled skin. As the barbell mass increases, the elephant wraps  
293 with increased arc length and greater surface area (**Figure 7C**). We consider two contributions to  
294 its surface area. First we consider a smooth ventral trunk devoid of wrinkles, shown by the black  
295 points (**Figure 7D**). The wrinkled surface area, from Equation (6) is shown in red. Since the tip  
296 has wrinkles of small wavelength, the additional surface area it provides is low. However, for the  
297 heaviest weight, the wrinkles contribute up to 15% of the surface area (**Figure 7D**).

## 298 5 Discussion

299 The Smith machine used in our experiments was designed for human weight lifting, but we were  
300 fortunate that the power generated by the elephant trunk is comparable to human power. When  
301 humans are lifting a barbell for a power clean, which involves lifting a barbell from the ground to  
302 the shoulders, they can achieve a power of 900 W on free weights, and 770 W on machine cleans  
303 for lifting just a 20 kg weight (Jones et al., 2008). When using just its trunk, the elephant lifts a  
304 20 kg using only  $238 \pm 14$  W of power, but could probably increase this amount with training.

305 To lift heavier weights, the elephant recruits greater surface area of contact using its trunk  
306 wrinkles. The ridges on human finger tips have been shown to increase friction by two mechanisms  
307 (Yum et al., 2020). On rough surfaces, the ridges deform and interlock into an uneven surface when  
308 gripping surfaces. This mechanism seems to also apply for elephants which often pick up rough  
309 objects such as tree bark, whose length scale of wrinkles seems a good match for the elephant



310 wrinkles, whose wavelength varies from mm to cm. The other mechanism for human fingertips is  
311 more subtle, but involves the maintenance of an optimal layer of sweat between the ridges. The  
312 length scale of elephant wrinkles is much larger than human fingertip ridges; moreover elephants  
313 have very few sweat glands (Wright & Luck, 1984). Therefore it is unlikely that moisture plays a  
314 role in elephant grip.

315 In this study, we only examined the elephant lifting a barbell, but other works have shown that  
316 elephants also use their ventral trunk to lift a variety of size and shape of objects (Dagenais et al.,  
317 2021). While we only studied picking up a cylindrical barbell, gripping with the wrinkled surfaces  
318 may be important for picking up a range of objects. There remain many aspects to successful lifting  
319 that are not understood. In many prehensile animals, the surface of the skin is heavily innervated  
320 with sensors. The elephant's skin is substantially tougher than these animals; therefore it remains  
321 unknown how it can resist the elements of the African climate, yet still have a sensitive touch.

## 322 **6 Conclusion**

323 In this study, we elucidate the kinematic and gripping strategies elephants use to lift barbells.  
324 Elephants maintain nearly constant tensile force by orienting their trunk vertically and decreasing  
325 their acceleration for the heaviest weights. They increase their degree of wrapping with heavier  
326 weights, modifying their grip from a simple lip to prevent the bar from rolling out, to spiraling  
327 their trunk completely around the bar to increase stability. We showed that the self-weight of the  
328 trunk can be used like a sailor's capstan to prevent slipping of the barbell. Incorporating a greater  
329 length trunk also brings into play deeper and longer-amplitude wrinkles, which can engage with  
330 asperities in objects to increase friction. We hope that this work inspires new kinds of adaptable  
331 biologically-inspired grippers.

## 332 **Conflict of Interest Statement**

333 The authors declare no conflicts of interest in any of this manuscript.

## 334 **Data Access Statement**

335 We have included MATLAB files for the elephant lifts, raw elephant lifting trials, and data spread-  
336 sheets of strain tracking available for download on a GitHub repository that is linked in the sup-  
337 plemental documents.

## 338 **Ethics Statement**

339 In working with animals from Zoo Atlanta. We received research permits from both Zoo Atlanta  
340 and Georgia Institute of Technology.

## 341 **Funding Statement**

342 D.L.H., A.K.S., J.N.W. were supported by the US Army Research Laboratory and the US Army  
343 Research Office Mechanical Sciences Division, Complex Dynamics and Systems Program, under  
344 contract number W911NF-12-R-0011.

## 345 Acknowledgements

346 This work was supported by the US Army Research Laboratory and US Army Research Office  
347 Mechanical Sciences Division Complex Dynamics and Systems Program, under contact number  
348 W911NF-12-4-00111. We thank A. Lee, M. Chan, and Y. Zhang for their early contributions.  
349 We thank the Zoo Atlanta elephant keepers with their assistance in performing experiments. We  
350 thank Dr. Ali Nabaviziadeh for arranging the collaboration with Dr. Reidenberg. We thank  
351 the imaging time donated by Dr. Cheuk Tang's group, Radiology, Neuroscience, & Psychiatry  
352 Translation and Molecular Imaging Institute at Icahn School of Medicine at Mount Sinai. We  
353 thank J. Osofsky and the Smithsonian Institution Museum of Natural History for their assistance  
354 with information regarding the frozen elephant trunk as well as loaning the elephant trunk to Icahn  
355 School of Medicine at Mount Sinai.

## 356 References

- 357 Bland, J. R. K. W. F. . (1954). *Solid Mensuration With Proofs Second 2nd Edition*. John Wiley  
358 & Sons.
- 359 Cartmill, M. (1972). *Arboreal Adaptations and the Origin of the Order Primates*. Routledge.  
360 Retrieved 2022-07-04, from [https://www.taylorfrancis.com/chapters/edit/10.4324/](https://www.taylorfrancis.com/chapters/edit/10.4324/9781315132129-4/arboreal-adaptations-origin-order-primates-matt-cartmill)  
361 [9781315132129-4/arboreal-adaptations-origin-order-primates-matt-cartmill](https://www.taylorfrancis.com/chapters/edit/10.4324/9781315132129-4/arboreal-adaptations-origin-order-primates-matt-cartmill)  
362 (Pages: 97-122 Publication Title: The Functional and Evolutionary Biology of Primates)  
363 doi: 10.4324/9781315132129-4
- 364 Dagenais, P., Hensman, S., Haechler, V., & Milinkovitch, M. C. (2021, August). Elephants evolved  
365 strategies reducing the biomechanical complexity of their trunk. *Current Biology*. doi: 10  
366 .1016/j.cub.2021.08.029
- 367 Emmons, L. H., & Gentry, A. H. (1983, April). Tropical Forest Structure and the Distribution of  
368 Gliding and Prehensile-Tailed Vertebrates. *The American Naturalist*, 121(4), 513–524. Re-  
369 trieved 2022-09-14, from <https://www.journals.uchicago.edu/doi/abs/10.1086/284079>  
370 (Publisher: The University of Chicago Press) doi: 10.1086/284079
- 371 Gao, X., Wang, L., & Hao, X. (2015, August). An improved Capstan equation including power-law  
372 friction and bending rigidity for high performance yarn. *Mechanism and Machine Theory*, 90,  
373 84–94. Retrieved 2021-05-03, from [https://www.sciencedirect.com/science/article/](https://www.sciencedirect.com/science/article/pii/S0094114X15000427)  
374 [pii/S0094114X15000427](https://www.sciencedirect.com/science/article/pii/S0094114X15000427) doi: 10.1016/j.mechmachtheory.2015.03.005
- 375 Garber, P., & Rehg, J. (1999). The ecological role of the prehensile tail in white-  
376 faced capuchins (*Cebus capucinus*). *American Journal of Physical Anthropology*, 110(3),  
377 325–339. (.eprint: [https://onlinelibrary.wiley.com/doi/pdf/10.1002/%28SICI%291096-](https://onlinelibrary.wiley.com/doi/pdf/10.1002/%28SICI%291096-8644%28199911%29110%3A3%3C325%3A%3AAID-AJPA5%3E3.0.CO%3B2-D)  
378 [8644%28199911%29110%3A3%3C325%3A%3AAID-AJPA5%3E3.0.CO%3B2-D](https://onlinelibrary.wiley.com/doi/pdf/10.1002/%28SICI%291096-8644%28199911%29110%3A3%3C325%3A%3AAID-AJPA5%3E3.0.CO%3B2-D)) doi: 10  
379 .1002/(SICI)1096-8644(199911)110:3<325::AID-AJPA5>3.0.CO;2-D
- 380 Hickman, G. C. (1979). The mammalian tail: a review of functions. *Mammal Review*, 9(4), 143–  
381 157. (.eprint: <https://onlinelibrary.wiley.com/doi/pdf/10.1111/j.1365-2907.1979.tb00252.x>)  
382 doi: 10.1111/j.1365-2907.1979.tb00252.x
- 383 Hoffmann, J. N., Montag, A. G., & Dominy, N. J. (2004). Meissner corpuscles and somatosensory  
384 acuity: The prehensile appendages of primates and elephants. *The Anatomical Record Part A:*  
385 *Discoveries in Molecular, Cellular, and Evolutionary Biology*, 281A(1), 1138–1147. (.eprint:  
386 <https://onlinelibrary.wiley.com/doi/pdf/10.1002/ar.a.20119>) doi: 10.1002/ar.a.20119
- 387 Iberall, T. (1997, June). Human Prehension and Dexterous Robot Hands. *The International*  
388 *Journal of Robotics Research*, 16(3), 285–299. (Publisher: SAGE Publications Ltd STM)

- 389 doi: 10.1177/027836499701600302
- 390 Jones, R. M., Fry, A. C., Weiss, L. W., Kinzey, S. J., & Moore, C. A. (2008, November). Kinetic  
391 Comparison of Free Weight and Machine Power Cleans:. *Journal of Strength and Condition-*  
392 *ing Research*, 22(6), 1785–1789. Retrieved 2018-09-20, from [https://insights.ovid.com/](https://insights.ovid.com/crossref?an=00124278-200811000-00010)  
393 [crossref?an=00124278-200811000-00010](https://insights.ovid.com/crossref?an=00124278-200811000-00010) doi: 10.1519/JSC.0b013e318185f068
- 394 Jones-Engel, L. E., & Bard, K. A. (1996). Precision grips in  
395 young chimpanzees. *American Journal of Primatology*, 39(1), 1–15.  
396 (.eprint: [https://onlinelibrary.wiley.com/doi/pdf/10.1002/%28SICI%291098-](https://onlinelibrary.wiley.com/doi/pdf/10.1002/%28SICI%291098-2345%281996%2939%3A1%3C1%3A%3AAID-AJP1%3E3.0.CO%3B2-2)  
397 [2345%281996%2939%3A1%3C1%3A%3AAID-AJP1%3E3.0.CO%3B2-2](https://onlinelibrary.wiley.com/doi/pdf/10.1002/%28SICI%291098-2345%281996%2939%3A1%3C1%3A%3AAID-AJP1%3E3.0.CO%3B2-2)) doi: 10.1002/  
398 (SICI)1098-2345(1996)39:1(1::AID-AJP1)3.0.CO;2-2
- 399 Laska, M. (1996, December). Manual Laterality in Spider Monkeys (*Ateles geoffroyi*) Solving  
400 Visually and Tactually Guided Food-Reaching Tasks. *Cortex*, 32(4), 717–726. Retrieved 2022-  
401 09-14, from <https://www.sciencedirect.com/science/article/pii/S0010945296800414>  
402 doi: 10.1016/S0010-9452(96)80041-4
- 403 Laska, M. (1998, January). Laterality in The Use of The Prehensile Tail in The Spider Mon-  
404 key (*Ateles geoffroyi*). *Cortex*, 34(1), 123–130. Retrieved 2022-09-14, from [https://](https://www.sciencedirect.com/science/article/pii/S001094520870741X)  
405 [www.sciencedirect.com/science/article/pii/S001094520870741X](https://www.sciencedirect.com/science/article/pii/S001094520870741X) doi: 10.1016/S0010-  
406 -9452(08)70741-X
- 407 Lourie, S. A., Pollom, R. A., & Foster, S. J. (2016, August). A global revision of the Seahorses Hip-  
408 pocampus Rafinesque 1810 (Actinopterygii: Syngnathiformes): Taxonomy and biogeography  
409 with recommendations for further research. *Zootaxa*, 4146(1), 1–66. Retrieved 2022-09-14,  
410 from <https://www.mapress.com/zt/article/view/zootaxa.4146.1.1> (Number: 1) doi:  
411 10.11646/zootaxa.4146.1.1
- 412 Marvi, H., Meyers, G., Russell, G., & Hu, D. L. (2011, January). Scalybot: A Snake-  
413 Inspired Robot With Active Control of Friction. In *ASME 2011 Dynamic Systems*  
414 *and Control Conference and Bath/ASME Symposium on Fluid Power and Motion Con-*  
415 *trol, Volume 2* (pp. 443–450). Arlington, Virginia, USA: ASMEDC. Retrieved 2021-  
416 07-06, from [https://asmedigitalcollection.asme.org/DSCC/proceedings/DSCC2011/](https://asmedigitalcollection.asme.org/DSCC/proceedings/DSCC2011/54761/443/353640)  
417 [54761/443/353640](https://asmedigitalcollection.asme.org/DSCC/proceedings/DSCC2011/54761/443/353640) doi: 10.1115/DSCC2011-6174
- 418 McGinn, C. (2015). *Prehension: The Hand and the Emergence of Humanity*. MIT Press. (Google-  
419 Books-ID: MGV0CgAAQBAJ)
- 420 Negrea, S., Botnariuc, N., & Dumont, H. J. (1999, October). Phylogeny, evolution and classification  
421 of the Branchiopoda (Crustacea). *Hydrobiologia*, 412(0), 191–212. Retrieved 2022-09-14, from  
422 <https://doi.org/10.1023/A:1003894207100> doi: 10.1023/A:1003894207100
- 423 Organ, J. M., Muchlinski, M. N., & Deane, A. S. (2011). Mechanoreceptivity of Prehensile Tail Skin  
424 Varies Between Ateline and Cebine Primates. *The Anatomical Record*, 294(12), 2064–2072.  
425 (.eprint: <https://onlinelibrary.wiley.com/doi/pdf/10.1002/ar.21505>) doi: 10.1002/ar.21505
- 426 Porter, M. M., Adriaens, D., Hatton, R. L., Meyers, M. A., & McKittrick, J. (2015, July). Why the  
427 seahorse tail is square. *Science*, 349(6243), aaa6683. Retrieved 2022-09-14, from [https://](https://www.science.org/doi/full/10.1126/science.aaa6683)  
428 [www.science.org/doi/full/10.1126/science.aaa6683](https://www.science.org/doi/full/10.1126/science.aaa6683) (Publisher: American Association  
429 for the Advancement of Science) doi: 10.1126/science.aaa6683
- 430 Pretorius, Y., de Boer, W. F., Kortekaas, K., van Wijngaarden, M., Grant, R. C., Kohi, E. M.,  
431 ... Prins, H. H. T. (2016, April). Why elephant have trunks and giraffe long tongues: how  
432 plants shape large herbivore mouth morphology. *Acta Zoologica*, 97(2), 246–254. Retrieved  
433 2018-09-19, from <http://doi.wiley.com/10.1111/azo.12121> doi: 10.1111/azo.12121
- 434 Read, W. T. (1937, January). Handbook of Engineering Fundamentals (Eshbach, Ovid W.,  
435 ed.). *Journal of Chemical Education*, 14(1), 49. Retrieved from [https://doi.org/10.1021/](https://doi.org/10.1021/ed014p49.2)  
436 [ed014p49.2](https://doi.org/10.1021/ed014p49.2) doi: 10.1021/ed014p49.2

- 437 Russo, G. A., & Young, J. W. (2011). Tail growth tracks the ontogeny of prehensile tail use in  
438 capuchin monkeys (*Cebus albifrons* and *C. apella*). *American Journal of Physical Anthropology*,  
439 *146*(3), 465–473. (eprint: <https://onlinelibrary.wiley.com/doi/pdf/10.1002/ajpa.21617>)  
440 doi: 10.1002/ajpa.21617
- 441 Schulz, A. K., Boyle, M., Boyle, C., Sordilla, S., Rincon, C., Hooper, S., ... Hu, D. L. (2022,  
442 August). Skin wrinkles and folds enable asymmetric stretch in the elephant trunk. *Proceedings*  
443 *of the National Academy of Sciences*, *119*(31), e2122563119. Retrieved 2022-09-12, from  
444 <https://www.pnas.org/doi/abs/10.1073/pnas.2122563119> (Publisher: Proceedings of  
445 the National Academy of Sciences) doi: 10.1073/pnas.2122563119
- 446 Schulz, A. K., Ning Wu, J., Ha, S. Y. S., Kim, G., Braccini Slade, S., Rivera, S., ... Hu,  
447 D. L. (2021). Suction feeding by elephants. *Journal of The Royal Society Interface*,  
448 *18*(179), 20210215. Retrieved 2021-06-16, from [https://royalsocietypublishing.org/](https://royalsocietypublishing.org/doi/10.1098/rsif.2021.0215)  
449 [doi/10.1098/rsif.2021.0215](https://royalsocietypublishing.org/doi/10.1098/rsif.2021.0215) (Publisher: Royal Society) doi: 10.1098/rsif.2021.0215
- 450 Wilson, J. F., Mahajan, U., Wainwright, S. A., & Croner, L. J. (1991). A Continuum  
451 Model of Elephant Trunks. *Journal of Biomechanical Engineering*, *113*(1), 79.  
452 Retrieved 2018-07-20, from [http://Biomechanical.asmedigitalcollection.asme.org/](http://Biomechanical.asmedigitalcollection.asme.org/article.aspx?articleid=1398531)  
453 [article.aspx?articleid=1398531](http://Biomechanical.asmedigitalcollection.asme.org/article.aspx?articleid=1398531) doi: 10.1115/1.2894088
- 454 Wright, P., & Luck, C. (1984, January). Do elephants need to sweat? *South*  
455 *African Journal of Zoology*, *19*(4), 270–274. (Publisher: Taylor & Francis eprint:  
456 <https://doi.org/10.1080/02541858.1984.11447892>) doi: 10.1080/02541858.1984.11447892
- 457 Wu, J., Zhao, Y., Zhang, Y., Shumate, D., Slade, S. B., Franklin, S. V., & Hu, D. L. (2018).  
458 Elephant trunks form joints to squeeze together small objects. *Journal of The Royal Society*  
459 *Interface*, *9*.
- 460 Yum, S.-M., Baek, I.-K., Hong, D., Kim, J., Jung, K., Kim, S., ... Park, G.-S. (2020, December).  
461 Fingerprint ridges allow primates to regulate grip. *Proceedings of the National Academy of*  
462 *Sciences*, *117*(50), 31665–31673. Retrieved 2022-04-24, from [https://www.pnas.org/doi/](https://www.pnas.org/doi/10.1073/pnas.2001055117)  
463 [10.1073/pnas.2001055117](https://www.pnas.org/doi/10.1073/pnas.2001055117) (Publisher: Proceedings of the National Academy of Sciences)  
464 doi: 10.1073/pnas.2001055117

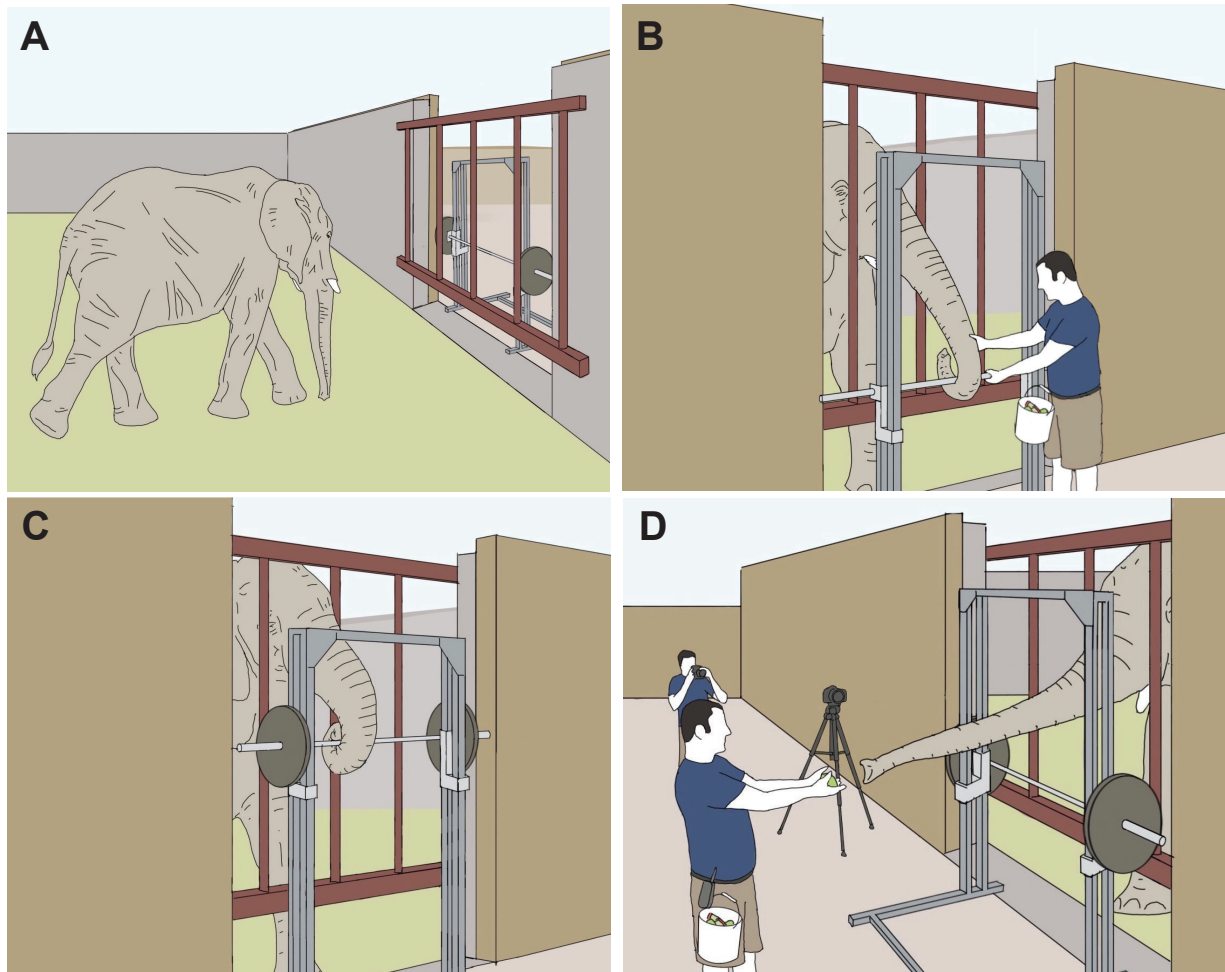

**Figure 1: Illustration sequence showing the procedures for elephant lifting the barbell.** a) The African elephant *Loxodonta africana* approaches the barbell setup for experimental procedure. b) Zoo Atlanta elephant keepers showing elephant how to wrap around the barbell and lift it. c) Elephant completing a trial with a heavier weight. d) After completing a trial, the elephant reaches out to Zoo Atlanta keeper for food incentive. Illustrations by Benjamin Seleb.



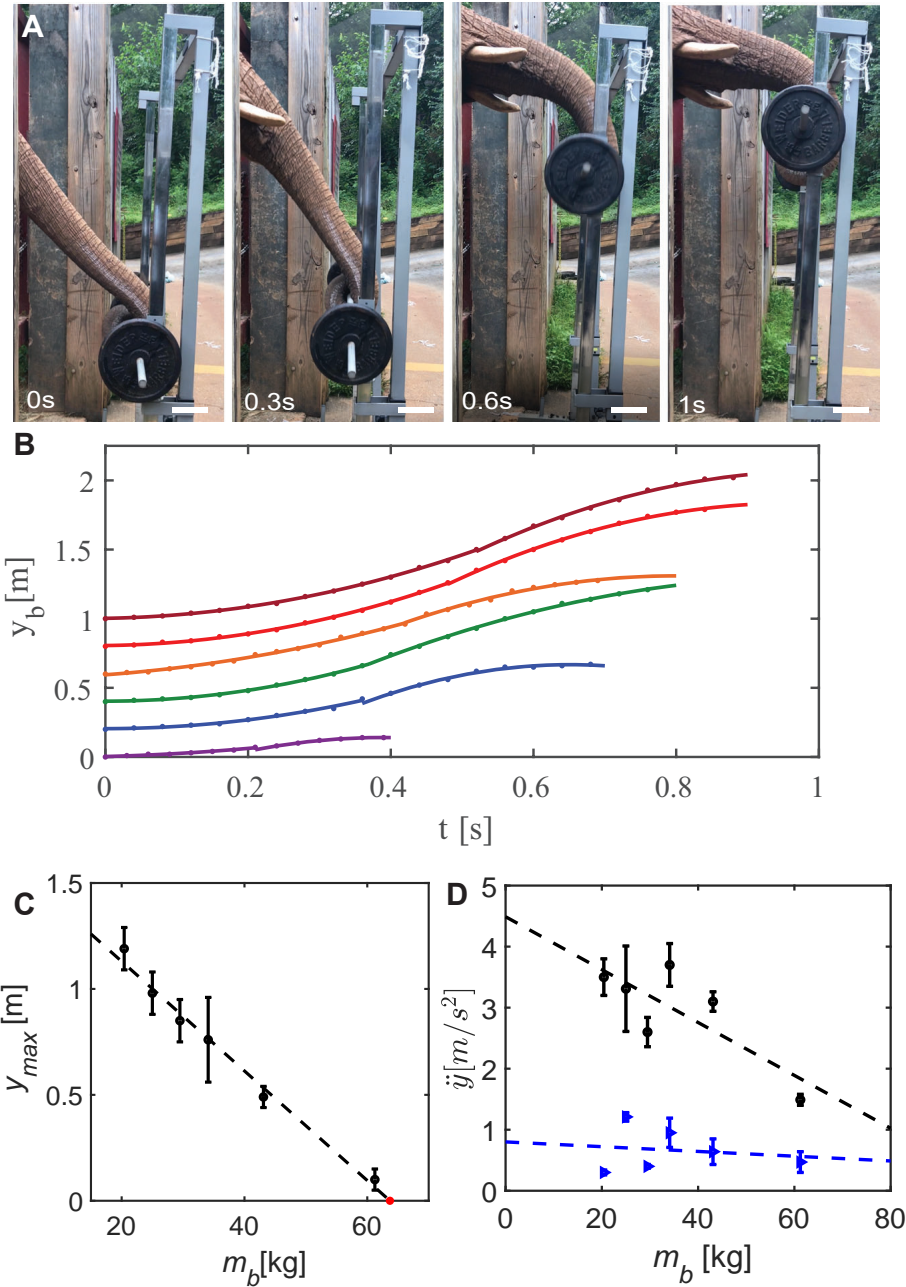

**Figure 2:** Kinematics of weight lifting. a) Time series of the elephant lifting a barbell at increments of 0.3s with scale bars showing 10 cm. b) Time course of the position of the barbell, with increments given between trajectory given for clarity. Weights include: maaron (20kg), red (25 kg), orange (30 kg), green (34 kg), blue (43 kg), purple (60 kg). Solid lines are best fit lines associated with constant acceleration  $a$  and constant deceleration. c) Relationship between maximum height of the elephant trunk and the barbell mass with red dot indicating the x-intercept, which is the maximum mass that the can be lifted in this setup. d) Relationship between vertical acceleration and barbell mass. The barbell and the base of the trunk are shown by black circles and blue triangles, respectively. Best fits given by the dashed lines.



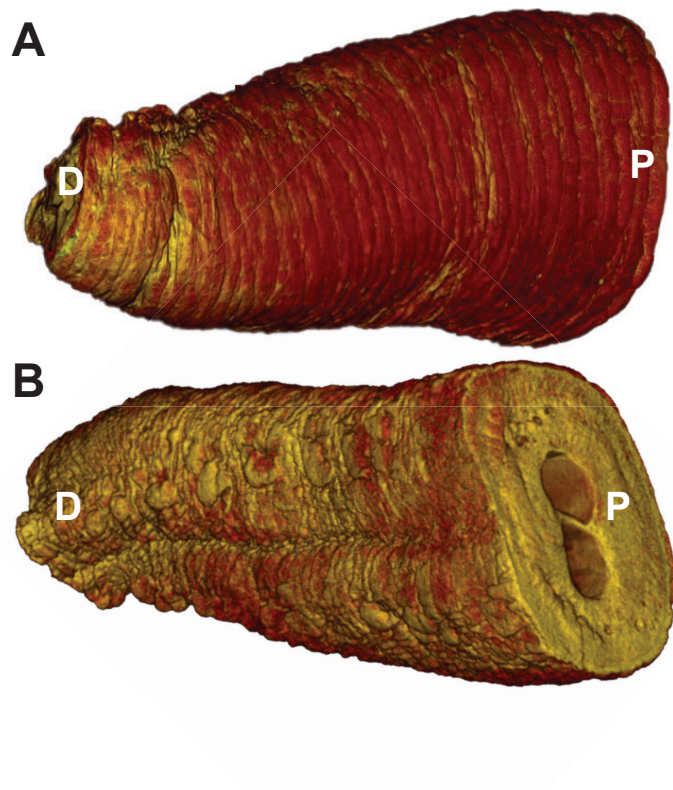

**Figure 3:** CT scan of the distal 60-cm of the trunk of a 38 year old female African elephant *Loxodonta africana*. a) dorsal section and b) ventral section. P refers to proximal (towards the skull), D refers to distal (towards the tip) at a distance of 60 cm from the tip.

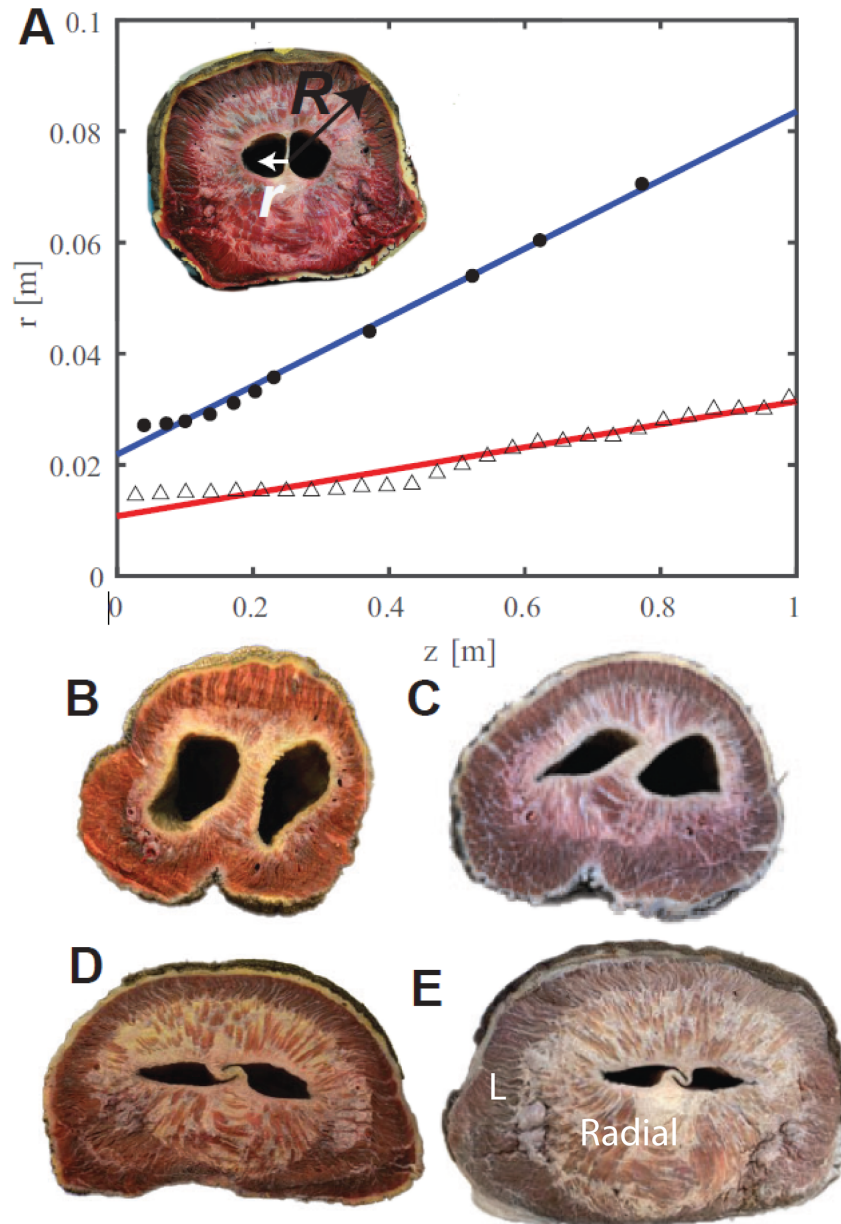

**Figure 4: Elephant trunk anatomy.** a) The relationship between radius of trunk and distance  $z$  from the tip. The trunk outer radius,  $R$  is given by the shaded circles and inner nasal radius,  $r$  by open triangles. Linear best fits are shown by the solid lines. b-e) Elephant trunk cross sections displaying muscle fibers and negative space created by nasal passageway. b) cross section 28 cm from distal tip. c) 56 cm from distal tip. d) 100 cm from distal tip. e) 140 cm from distal tip. With L indicating longitudinal muscles, and radial muscles labeled on the cross section.

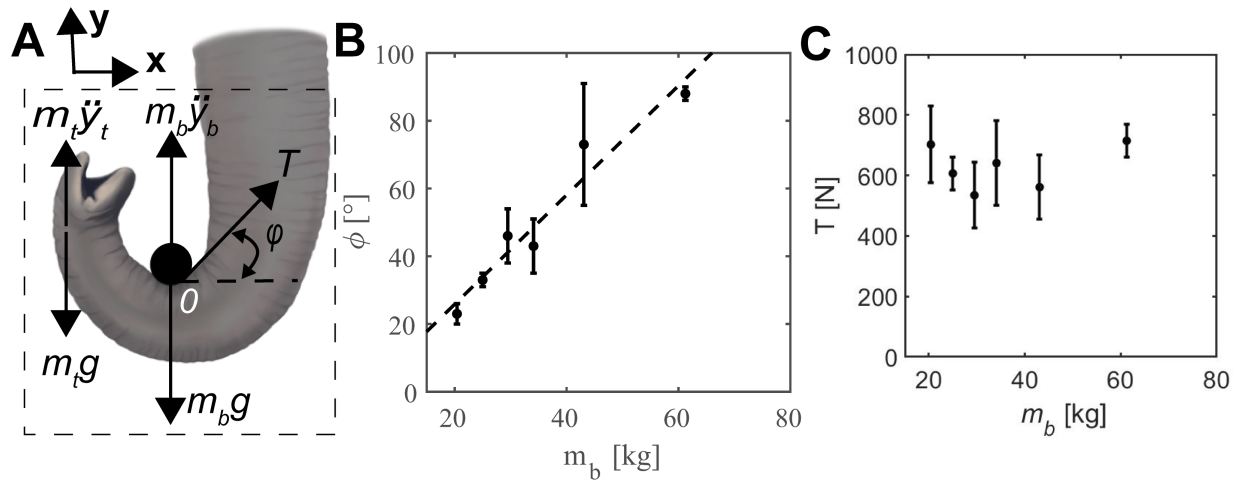

**Figure 5: Forces exerted on the barbell.** a) Free body diagram of elephant lifting a barbell. The elephant applies a tension  $T$  to the barbell to lift it at contact point  $O$ . The trunk is at an angle of contact  $\phi$  with respect to the horizontal. The combined trunk and barbell mass experiences gravity  $g$  and an upward acceleration  $\ddot{y}$ . b) The relationship between angle of contact  $\phi$  and barbell mass with linear best fit given by the dashed line. c) The relationship between tension  $T$  and barbell mass.

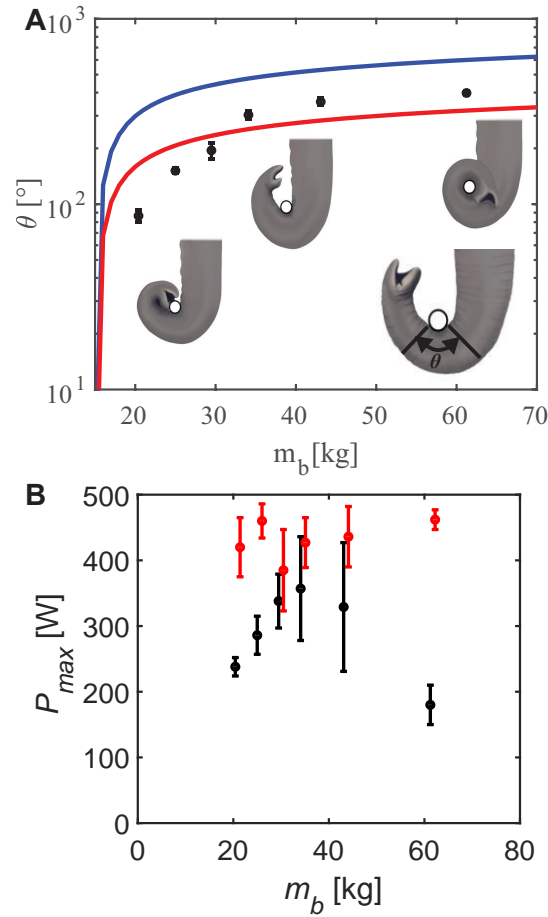

**Figure 6:** Elephants wrap the trunk to lift heavier weights. a) The relationship between angle of trunk wrap  $\theta$  and barbell mass. Schematics, from left to right, show the increasing wrapping of the trunk for barbell weights 20 kg, 25 kg, and 60 kg. Theoretical predictions with friction coefficient of 0.5 and 1.5 are shown by the blue and red lines, respectively. b) Maximum power exerted to lift different barbell masses. Power is calculated at two locations, the distal tip (black circles) and the proximal root (red circles).

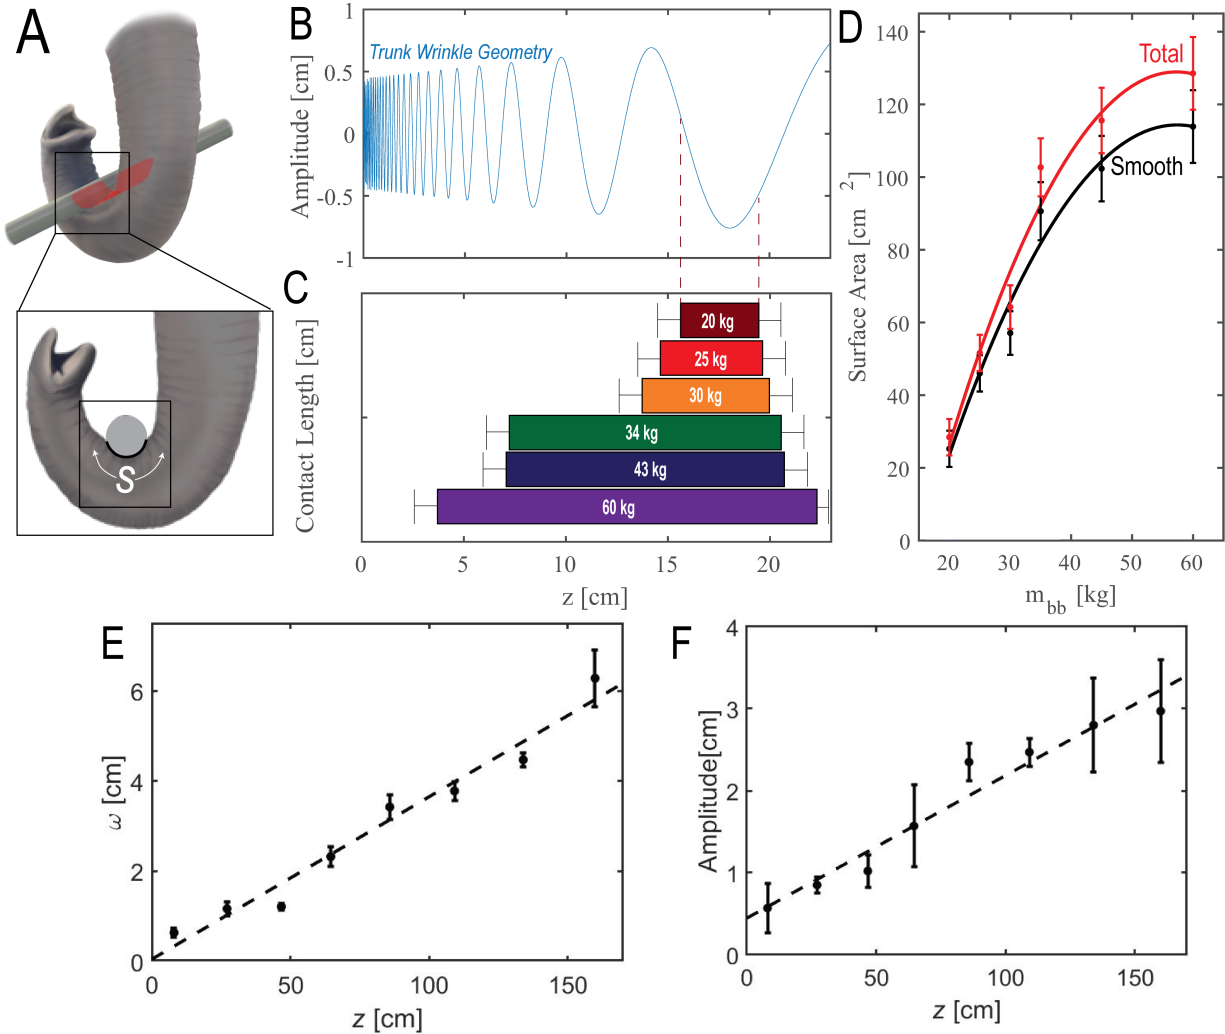

**Figure 7:** Elephants adjust grip to allow more wrinkled contact with the barbell. a) Schematic displaying the elephant’s area of contact with the barbell. Last inset shows magnification indicating that the wrinkles increase the surface area. b) Surface profile along the trunk’s longitudinal direction. Wrinkles increase in amplitude and wavelength with distance from the tip, which is at  $z=0$ . c) Total contact length  $s$  of the barbell for different barbell weights. d) Surface area of contact across weight classes, with black showing the surface area without wrinkles and red the surface area with wrinkles included. e) Wavelength of the elephant wrinkles from the tip of the trunk to the base. f) Amplitude of the elephant wrinkles from the tip of the trunk to the base.
